# Supplementary material for: Activity of tumor-associated macrophage depletion by CSF1R blockade is highly dependent on the tumor model and timing of treatment
Source: Springer Nature journal article supplement (doi:10.1007/s00262-021-02861-3), 2021-01-29
Supplement: MOESM1 [file 18811918]

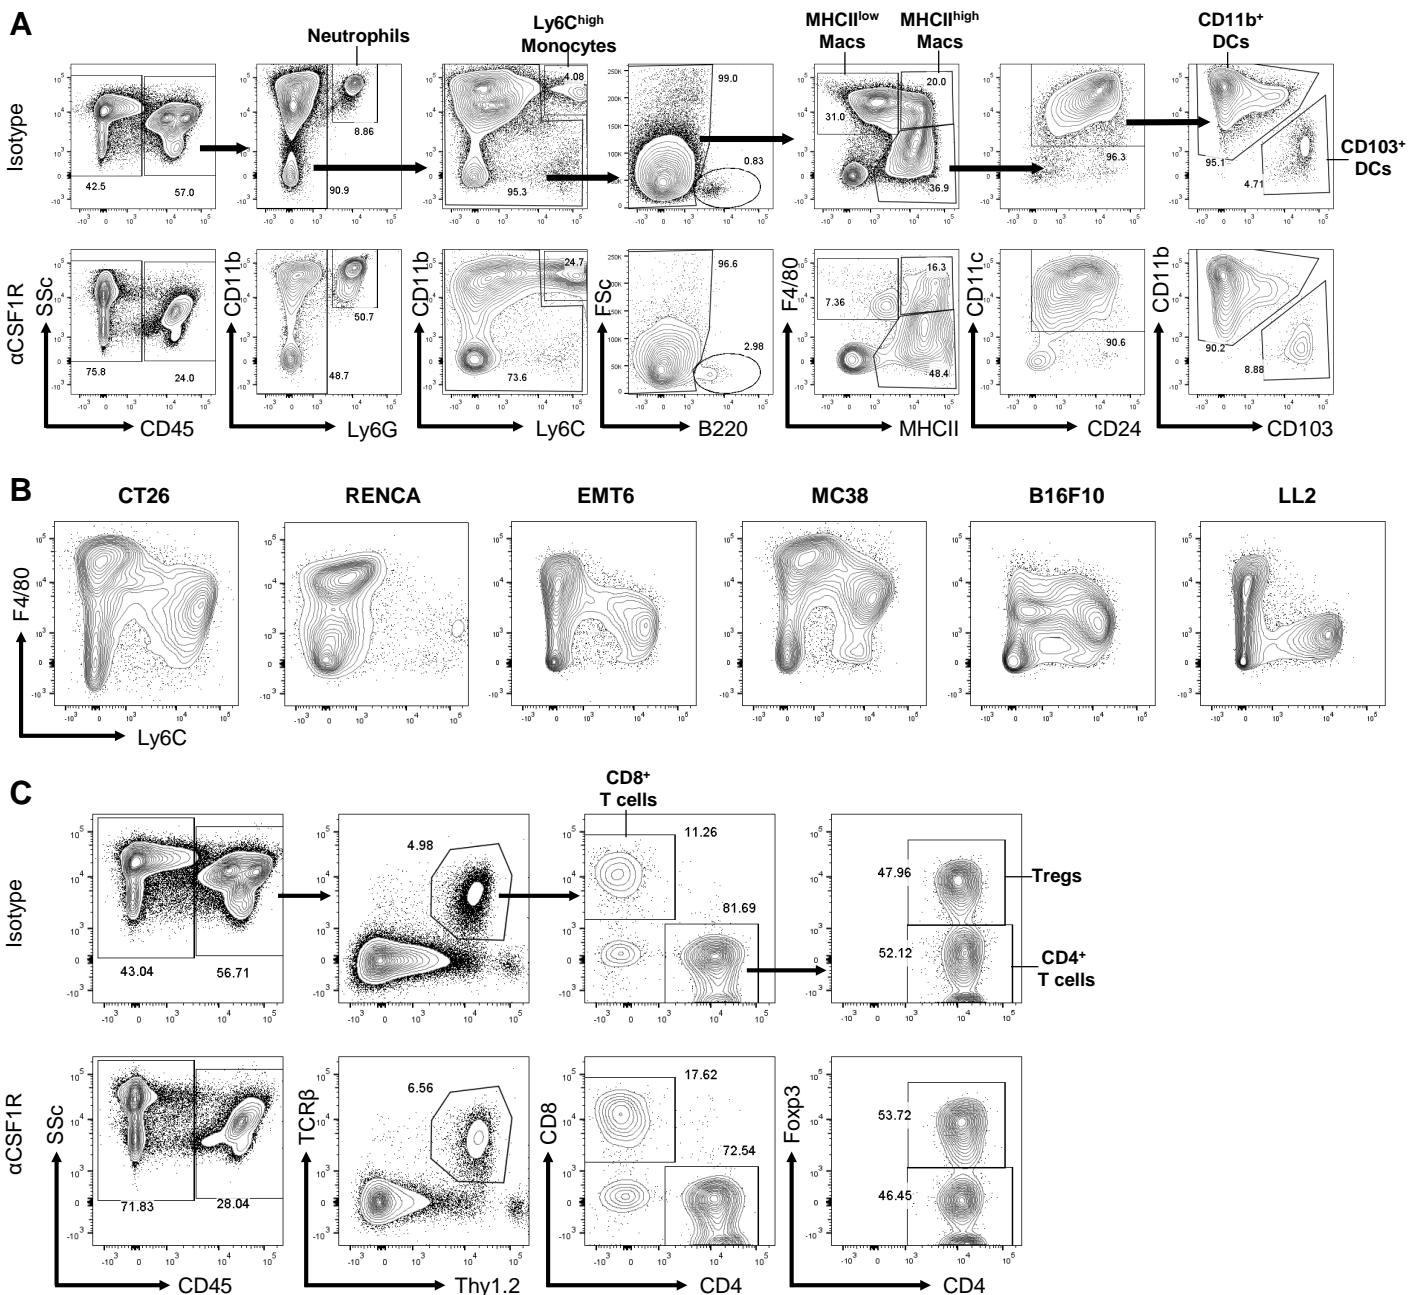

**Supplemental Figure 1. Tumor immune cell gating strategy.**

**a** Myeloid cell gating strategy used to identify neutrophils, Ly6C<sup>high</sup> classical monocytes, MHCII<sup>high</sup> and MHCII<sup>low</sup> macrophages, and CD103<sup>+</sup> (cDC1) and CD11b<sup>+</sup> (cDC2) dendritic cells. Note, this gating scheme does not allow identification of tumor-associated Ly6C<sup>low</sup> non-classical monocytes, which may be carried over into the macrophage gates. **b** F4/80 versus Ly6C staining on cells from CD45<sup>+</sup>Ly6G<sup>-</sup> (non-neutrophil) gate shows the ability to distinguish F4/80<sup>high</sup> macrophages from F4/80<sup>int</sup>Ly6C<sup>high</sup> classical monocytes using this gating scheme. **c** T cell gating strategy. Histograms in **(a)** and **(c)** are from RENCA tumors, with the top row showing a representative isotype control-treated tumor and the bottom row showing a representative αCSF1R-treated tumor. Cell populations of interest are indicated.

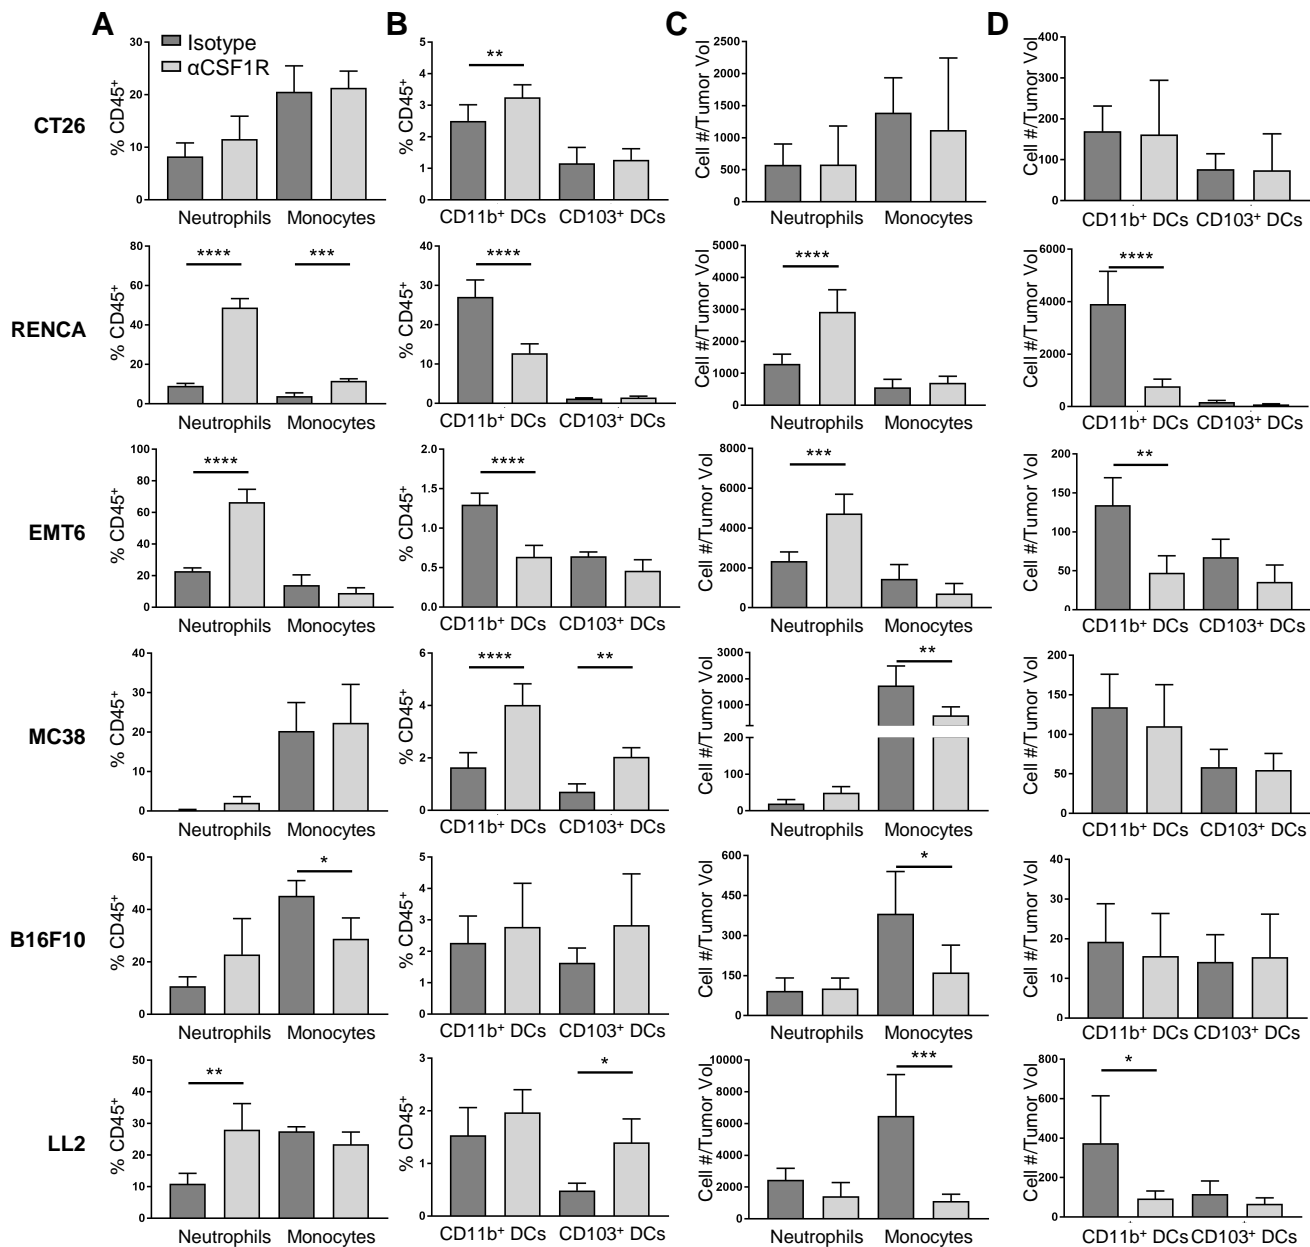

**E**

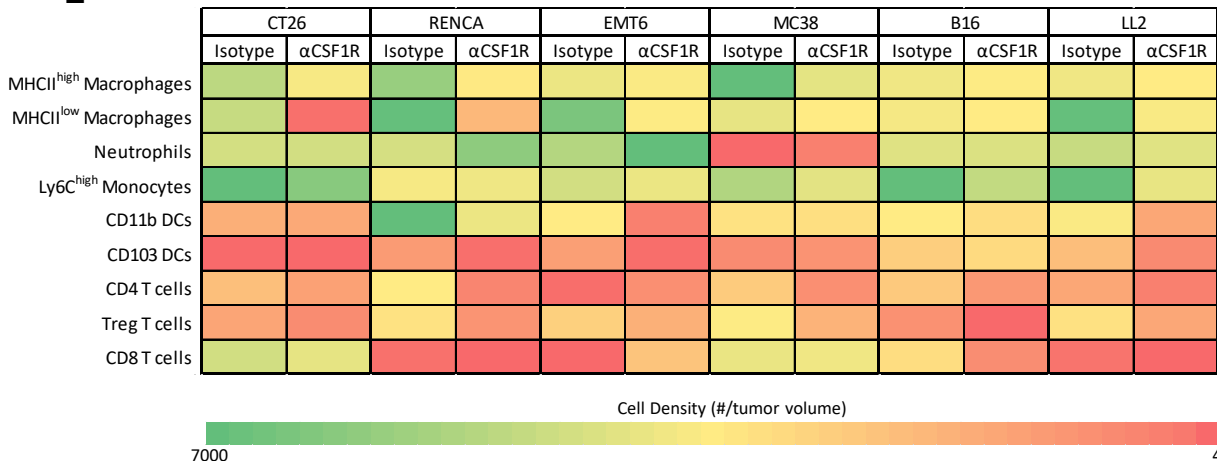

## **Supplemental Figure 2. Changes in innate immune populations after $\alpha$ CSF1R treatment.**

100mm<sup>3</sup> subcutaneous tumor-bearing mice were treated with 4 doses of  $\alpha$ CSF1R or isotype control antibody and tumor-associated immune populations were assessed by flow cytometry as in Supplemental Figure 1. CD11b<sup>+</sup>Ly6G<sup>+</sup> neutrophils and CD11b<sup>+</sup>Ly6C<sup>+</sup> monocytes (**a, c**) and CD24<sup>+</sup>CD11c<sup>+</sup> DCs subdivided based on their expression of CD103 or CD11b (**b, d**) are shown as a percentage of total CD45<sup>+</sup> immune cells (**a, b**) or cell density (cell number/tumor volume) (**c, d**); n=5-10 animals/group. **e** Heatmap representing cell density (cell number/tumor volume) of specific immune populations within different tumor models following treatment with  $\alpha$ CSF1R or isotype control antibodies, as indicated. One-way ANOVA, Tukey's multiple comparisons. \*p<0.05, \*\*p<0.01, \*\*\*p<0.001, \*\*\*\*p<0.0001.

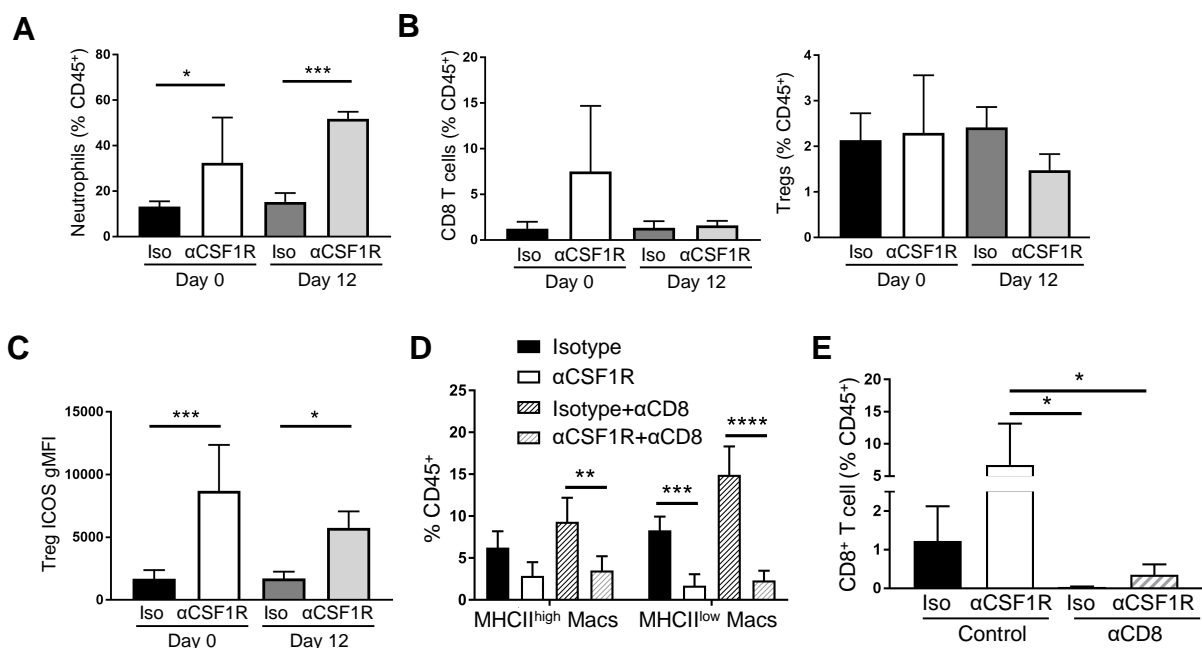

### Supplemental Figure 3. Early vs late initiation of αCSF1R therapy in Renca tumors.

**a-c** Flow cytometry of RENCA tumors treated on day 0 or day 12 with αCSF1R or control antibodies. Neutrophils (**a**) and CD8 and Treg cells (**b**) shown as a percentage of CD45<sup>+</sup> immune cells. **c** Geometric mean fluorescence intensity (gMFI) for ICOS staining on Treg populations. **d, e** Depletion of TAMs (**d**) and CD8<sup>+</sup> T cells (**e**) in RENCA tumors isolated from mice treated at day 0 with αCSF1R, αCD8, or control antibodies as indicated in Fig. 3d; n=5-7 animals/group. One-way ANOVA, Tukey's multiple comparisons. \*p<0.05, \*\*p<0.01, \*\*\*p<0.001, \*\*\*\*p<0.0001.

|           | Day 0   |        |            |        |             |          | Day 12  |        |            |        |             |          |
|-----------|---------|--------|------------|--------|-------------|----------|---------|--------|------------|--------|-------------|----------|
|           | Isotype |        | Anti-CSF1R |        | Fold Change | P Value  | Isotype |        | Anti-CSF1R |        | Fold Change | P Value  |
|           | -dCT    | St Dev | -dCT       | St Dev |             |          | -dCT    | St Dev | -dCT       | St Dev |             |          |
| BATF3     | -4.78   | 0.46   | -5.40      | 1.43   | -1.54       | 0.3088   | -5.13   | 0.74   | -6.80      | 0.78   | -3.1661     | 0.0090   |
| CD11b     | 0.87    | 0.27   | -1.59      | 0.86   | -5.51       | <0.00001 | 0.76    | 0.09   | -4.17      | 0.39   | -30.409     | <0.00001 |
| CD11C     | -1.55   | 0.11   | -2.51      | 0.38   | -1.95       | 0.0001   | -1.45   | 0.16   | -3.39      | 0.34   | -3.8455     | <0.00001 |
| CD3E      | -3.65   | 1.12   | -2.26      | 0.75   | 2.61        | 0.0300   | -4.18   | 0.70   | -5.43      | 0.77   | -2.3868     | 0.0358   |
| CD4       | -3.04   | 0.49   | -4.13      | 0.57   | -2.12       | 0.0362   | -3.06   | 0.49   | -6.42      | 1.06   | -10.2652    | <0.00001 |
| CD45      | 1.00    | 0.17   | -0.40      | 0.57   | -2.64       | <0.00001 | 0.62    | 0.29   | -2.24      | 0.11   | -7.2457     | <0.00001 |
| CD8A      | -5.14   | 1.77   | -2.47      | 0.95   | 6.35        | 0.0053   | -5.28   | 0.89   | -5.73      | 0.84   | -1.3743     | 0.5802   |
| CMPK2     | -1.87   | 0.55   | -0.57      | 0.66   | 2.48        | 0.0004   | -2.06   | 0.13   | -2.21      | 0.25   | -1.1102     | 0.5898   |
| CSF1R     | 2.13    | 0.10   | -1.18      | 0.68   | -9.93       | <0.00001 | 2.00    | 0.21   | -2.45      | 0.23   | -21.9692    | <0.00001 |
| CXCL10    | -1.81   | 0.66   | -0.24      | 1.14   | 2.97        | 0.0030   | -2.06   | 0.19   | -3.78      | 0.44   | -3.291      | 0.0009   |
| CXCL9     | -2.69   | 1.55   | 0.69       | 1.29   | 10.44       | 0.0006   | -3.21   | 0.73   | -3.49      | 0.97   | -1.208      | 0.7171   |
| Eselectin | -9.18   | 0.36   | -6.90      | 1.54   | 4.84        | 0.0298   | -8.30   | 1.62   | -7.84      | 0.29   | 1.3822      | 0.5854   |
| F4/80     | -0.75   | 0.22   | -3.83      | 1.13   | -8.42       | <0.00001 | -1.12   | 0.40   | -6.05      | 0.46   | -30.5187    | <0.00001 |
| GZMB      | -7.41   | 1.94   | -3.50      | 1.59   | 15.04       | 0.0026   | -8.17   | 1.28   | -9.06      | 0.66   | -1.8423     | 0.4683   |
| IFIT1     | -3.36   | 0.35   | -1.64      | 0.62   | 3.28        | 0.0001   | -3.68   | 0.46   | -3.65      | 0.46   | 1.0199      | 0.9252   |
| IFNG      | -8.12   | 0.89   | -4.91      | 1.67   | 9.27        | 0.0095   | -9.28   | 1.10   | -10.04     | 1.06   | -1.6972     | 0.5091   |
| IL6       | -8.15   | 0.96   | -6.13      | 1.52   | 4.08        | 0.0345   | -7.79   | 0.90   | -7.70      | 0.21   | 1.0669      | 0.9051   |
| IL7       | -5.61   | 1.00   | -3.98      | 0.53   | 3.11        | 0.0023   | -5.13   | 0.60   | -4.88      | 0.28   | 1.1867      | 0.5650   |
| NKp46     | -7.85   | 2.06   | -5.33      | 0.85   | 5.75        | 0.0157   | -7.87   | 1.06   | -8.05      | 0.77   | -1.1335     | 0.8579   |
| PRF1      | -7.86   | 1.04   | -4.31      | 0.69   | 11.70       | 0.0018   | -9.37   | 1.71   | -9.22      | 0.61   | 1.1115      | 0.8646   |
| Pselectin | -6.07   | 1.36   | -3.98      | 0.57   | 4.27        | 0.0013   | -6.09   | 0.40   | -5.36      | 0.33   | 1.6649      | 0.1636   |
| T-bet     | -7.67   | 1.72   | -5.85      | 1.06   | 3.54        | 0.0869   | -8.12   | 2.14   | -8.45      | 0.61   | -1.2577     | 0.7715   |
| TIGIT     | -6.24   | 0.79   | -4.90      | 0.53   | 2.54        | 0.0109   | -6.41   | 0.53   | -6.95      | 0.82   | -1.4585     | 0.2309   |
| XL1       | -7.64   | 1.55   | -5.33      | 1.39   | 4.96        | 0.0107   | -8.19   | 0.93   | -8.37      | 0.34   | -1.13       | 0.8257   |

#### Supplemental Figure 4. Early initiation of $\alpha$ CSF1R therapy potentiates inflammatory gene expression in RENCA model.

Fluidigm qRT-PCR data from Figure 4. -dCT values were calculated by normalizing expression of individual genes to the *Ipo8*, *Tbp*, and *Hrpt* housekeeping genes. Average -dCT values and standard deviation are shown; n=4-5 animals/group. Fold change and p-value (two-tailed t-test) for  $\alpha$ CSF1R vs isotype control comparisons were calculated using the General Linear Model function of Array Studio software. Fold change is on a linear scale; values  $\geq 1$  represents higher gene expression in  $\alpha$ CSF1R group relative to isotype group while fold change  $\leq -1$  represents lower gene expression in  $\alpha$ CSF1R group relative to isotype group.

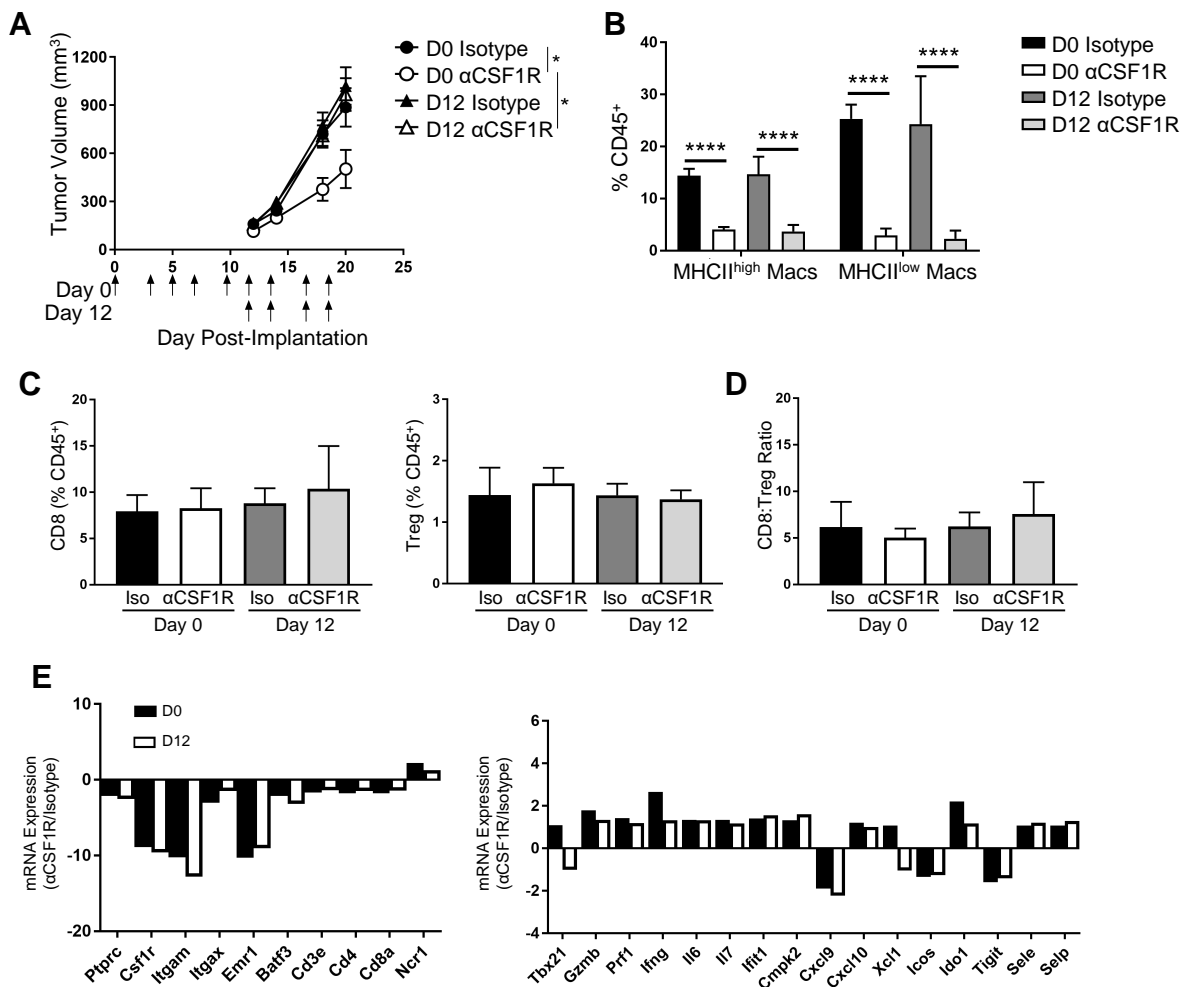

### Supplemental Figure 5. Effect of early vs late dosing of $\alpha$ CSF1R in CT26 tumors.

**a** Tumor growth curves for mice treated as indicated by arrows starting on day 0 or 12 post-tumor implantation;  $n=10$  animals/group. One-way ANOVA, Sidak's multiple comparisons ( $\alpha$ CSF1R vs isotype control at D0 and D12,  $\alpha$ CSF1R D0 vs  $\alpha$ CSF1R D12). **b-d** Frequency of TAMs (**b**) and CD8<sup>+</sup> T cells and Treg cells (**c**) as a percentage of CD45<sup>+</sup> cells and ratio of CD8<sup>+</sup> T cells to Tregs (**d**) in tumor as measured by flow cytometry;  $n=5$  animals/group. One-way ANOVA, Tukey's multiple comparisons. **e** Fluidigm qRT-PCR analysis. Graphs represent average  $-dCT$  values for  $\alpha$ CSF1R over isotype-treated animals;  $n=4-5$  animals/group. \* $p<0.05$ , \*\*\* $p<0.001$ , \*\*\*\* $p<0.0001$
